# Supplementary material for: Cation distribution: a descriptor for hydrogen evolution electrocatalysis on transition-metal spinels
Source: Royal Society of Chemistry journal article supplement (doi:10.1039/d4ey00121d), 2024-01-01
Supplement: d4ey00121d1.pdf [file d4ey00121d1.pdf]

Supporting information

## Cations Distribution: A Descriptor for Hydrogen Evolution Electrocatalysis on Transition-Metal Spinel

*Aya K. Gomaa<sup>a</sup>, Maram G. Zonkol<sup>a</sup>, Ghada E. Khedr<sup>b</sup>, Nageh K. Allam<sup>a\*</sup>*

<sup>a</sup>Energy Materials Laboratory, Physics Department, School of Sciences & Engineering, The American University in Cairo, New Cairo 11835, Egypt

<sup>b</sup>Department of Analysis and Evaluation, Egyptian Petroleum Research Institute, Cairo 11727, Egypt

\*Corresponding Author's email: [nageh.allam@aucegypt.edu](mailto:nageh.allam@aucegypt.edu)

### Contents

- FE calculations.
- TOF calculations.
- **Figure S1.** XRD spectrum of CoFe<sub>2</sub>O<sub>4</sub> powder at different pH.
- **Figure S2.** Full spectrum FTIR of CoFe<sub>2</sub>O<sub>4</sub> powder at different pH.
- **Figure S3.** XPS spectrum of CoFe<sub>2</sub>O<sub>4</sub>/Ni foam. High resolution spectra of Ni 2p and O 1s.
- **Figure S4.** iR-corrected LSV at different scan rates (2, 5, 10 mV/s) for pH 9 sample.
- **Figure S5.** CV scan of CoFe<sub>2</sub>O<sub>4</sub>/Ni foam at pH 12.5 and pH 13.
- **Figure S6.** SEM image of the sample before and after stability.
- **Figure S7.** EDS of CoFe<sub>2</sub>O<sub>4</sub>/ Ni foam catalyst prepared at pH 9 before CP stability test for continuous electrolysis.
- **Figure S8.** EDS of CoFe<sub>2</sub>O<sub>4</sub>/ Ni foam catalyst prepared at pH 9 after CP stability test for continuous electrolysis.
- **Figure S9.** PDOS for a) CFOi and b) CFOdis0.2.
- **Figure S10.** HER free energy diagram for catalysts without Ni foam
- **Table S1.** The electrocatalytic activity of our catalyst compared to those recently reported in the literature.
- **Table S2.** The current densities normalized to ESCA at different potential values for pH 9, 12.5, 13 respectively.

### Faradaic efficiency (FE) calculations:

To measure the faradaic efficiency of the hydrogen produced from CoFe<sub>2</sub>O<sub>4</sub>/Ni foam, water displacement method was applied. Chronopotentiometry was performed at a current density of 20 mA/cm<sup>2</sup> for 1h. The amount of hydrogen and oxygen produced was collected and measured via an inverted 10ml measuring cylinder in a sink of water.

Following the amount of hydrogen produced was calculated theoretically and experimentally to calculate the FE using the following equations.

*Amount of hydrogen theoretically:*

- The number of electrons used to produce hydrogen = Q applied at certain time/ Faraday's constant.
- Every one mole of H<sub>2</sub> produced 2e<sup>-</sup> are required.
- No. of moles of hydrogen produced (n) = No. of electrons /2.

*Amount of hydrogen experimentally:*

- No of moles of hydrogen produced = amount of the displaced volume of water (L) / 22.4

$$\% \text{ FE} = \frac{\text{No. of moles of Hydrogen produced experimentally}}{\text{No. of moles of Hydrogen produced theoretically}} * 100$$

### Turnover frequency (TOF) calculations:

TOF of the electrocatalyst is a critical kinetic parameter that indicates the speed at which an electrocatalyst can catalyze a specific electrochemical reaction. TOFs for both HER and OER mechanisms can be calculated per unit time using the following formula, based on the pseudo-first-order kinetics, as reported in previous studies.

$$TOF = \frac{jN_A}{nF\Gamma}$$

where j is the current density (mA/cm<sup>2</sup>) measured, N<sub>A</sub> is the Avogadro number, F is Faraday constant (96485), n is the number of electrons transferred (which is for HER=2, and OER= 4), and Γ is the moles of the surface-active sites included within the used catalyst.

Therefore, the total number of H<sub>2</sub> produced per geometric area was calculated from the current density value extracted from the HER-LSV polarization curve as the following:

$$\begin{aligned} \# H_2 &= |J|(\text{mA/cm}^2) * \left( \frac{1 \text{ C/s}}{1000 \text{ mA}} \right) * \left( \frac{1 \text{ mol } e^-}{96485} \right) * \left( \frac{1 \text{ mol } H_2}{2e^-} \right) * \left( \frac{6.023 \times 10^{23} H_2 \text{ molecules}}{1 \text{ mol } H_2} \right) \\ &= 3.12 \times 10^{15} \frac{H_2 s^{-1}}{\text{cm}^2} \text{ per } \frac{\text{mA}}{\text{cm}^2} \end{aligned}$$

Since the total number of active sites are not precisely determined the exact number of binding sites for H<sub>2</sub> are not determined exactly. We calculated the total number of active sites as the total number of the surface sites from the unit cell of the catalyst (CoFe<sub>2</sub>O<sub>4</sub>) which could possibly underestimate the real TOF values.

From the crystal structure of CoFe<sub>2</sub>O<sub>4</sub>, we can calculate the number of active sites according to following equations:

$$\# \text{ Surface sites} = \left( \frac{56 \text{ atoms per unit cell}}{602.58 \text{ \AA}^3 \text{ per unit cell}} \right)^{\frac{3}{2}}$$

$$\text{TOF}_{\text{HER}} = \frac{3.15 \times 10^{15} * |J|}{\# \text{ Surface active sites} * A (\text{ECSA})} = \frac{3.15 \times 10^{15} * |J|}{2.05 \times 10^{15} * 241.5}$$

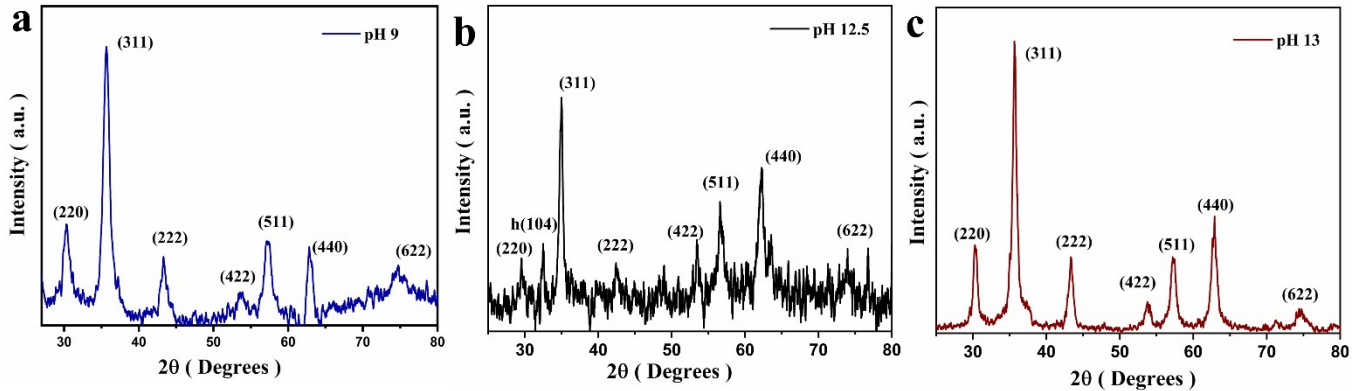

**Figure S1.** XRD spectrum of  $\text{CoFe}_2\text{O}_4$  powder prepared at pH (a) 9, (b) 12.5 and (c) 13. The peak at  $32.5^\circ$  in (b) is assigned to hematite (104).

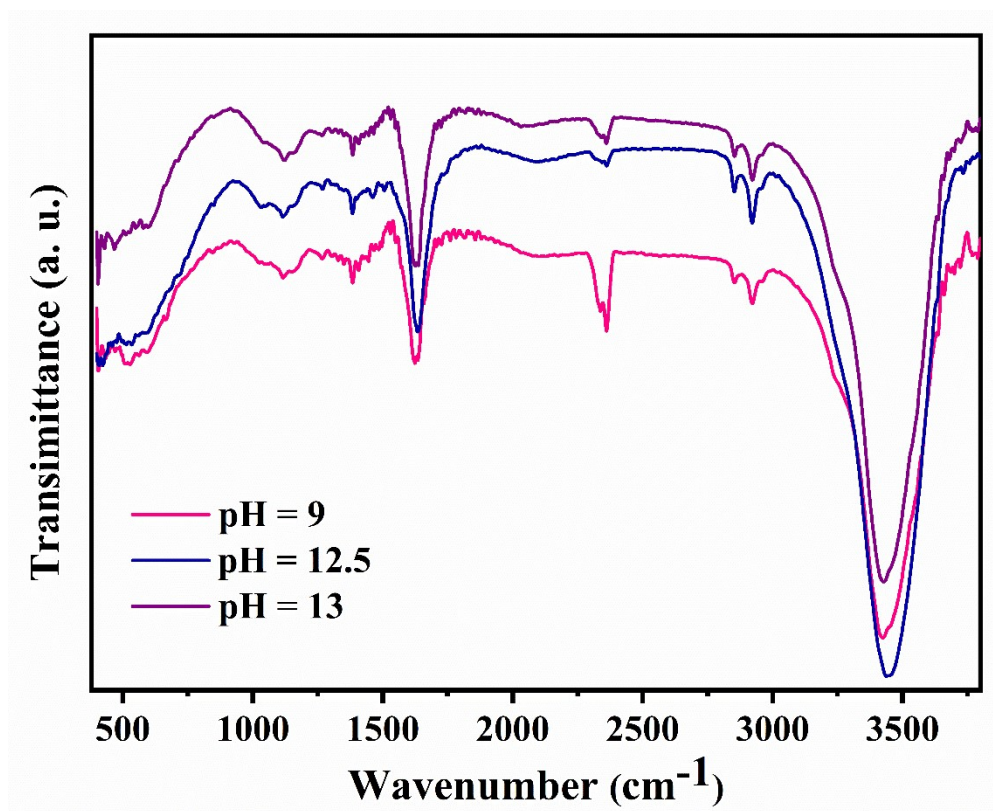

**Figure S2.** Full FTIR spectrum of  $\text{CoFe}_2\text{O}_4$  powder prepared at pH (a) 9, (b) 12.5, and (c) 13.

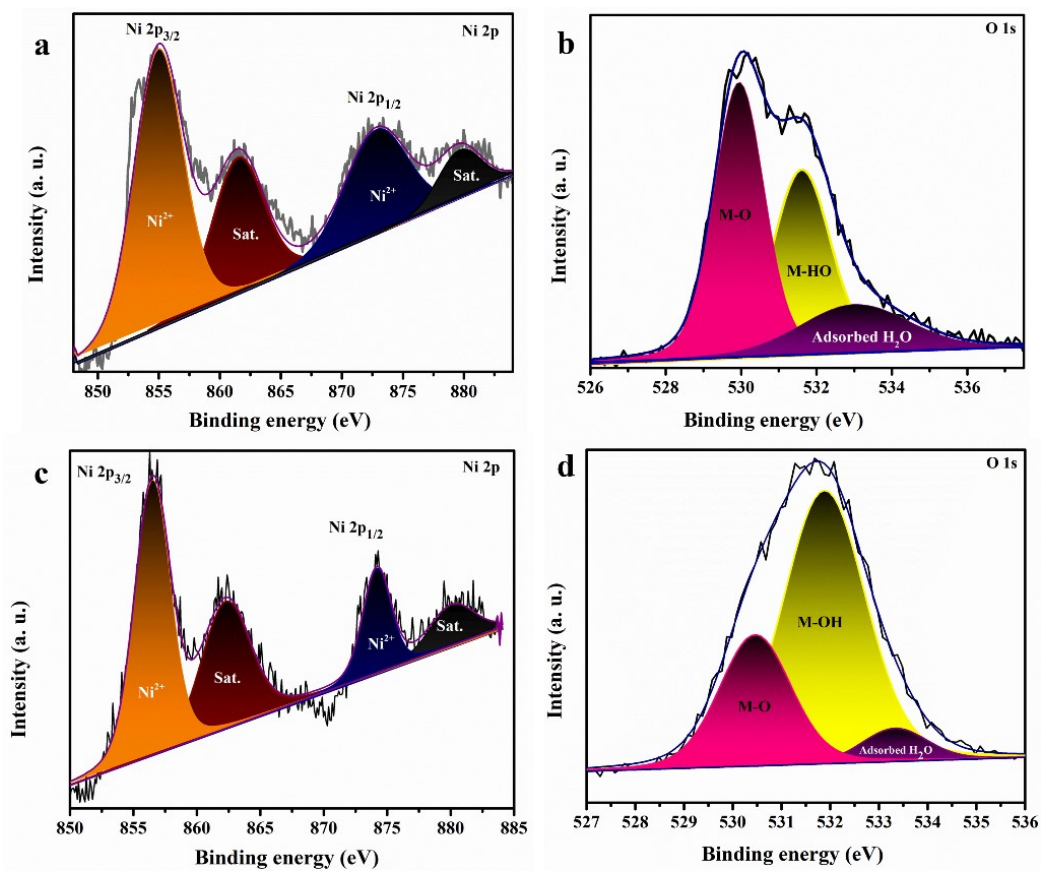

**Figure S3.** XPS spectrum of CoFe<sub>2</sub>O<sub>4</sub>/Ni foam. (a) Ni 2p. (b) O 1s for pH 9 sample and (c) Ni 2p, and (d) O 1s for pH 13 sample.

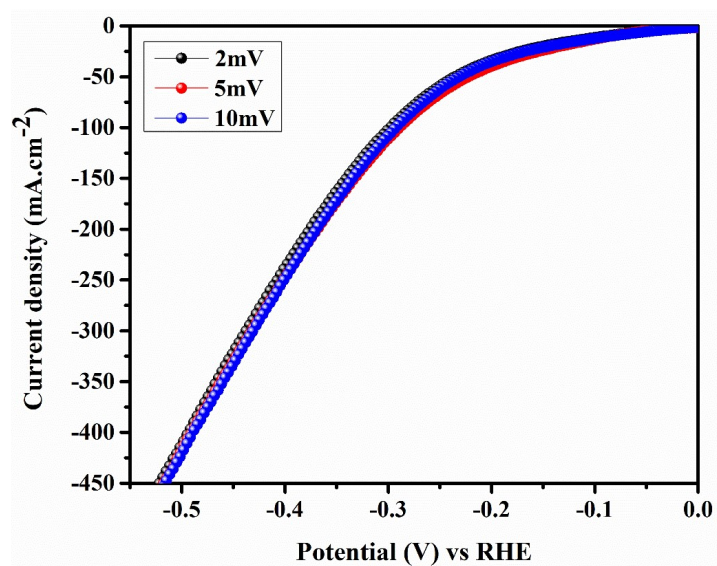

**Figure S4.** iR-corrected LSV at different scan rates (2, 5, 10 mV/s) for pH 9 sample

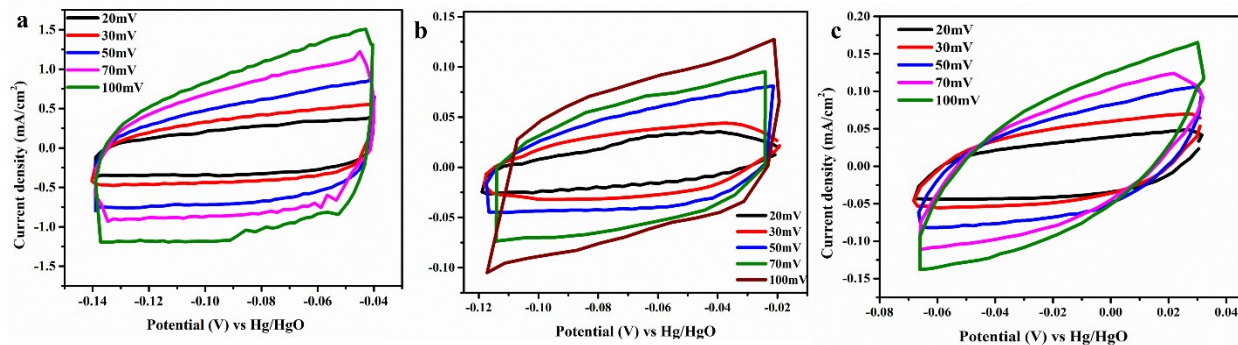

**Figure S5.** Determination of ECSA for CoFe<sub>2</sub>O<sub>4</sub>/Ni foam prepared at different pHs. CV scans at different scan rates (20 -100 mV s<sup>-1</sup>) in 1 M KOH for the catalysts prepared at a) pH 9, b) pH 12.5, and c) pH 13.

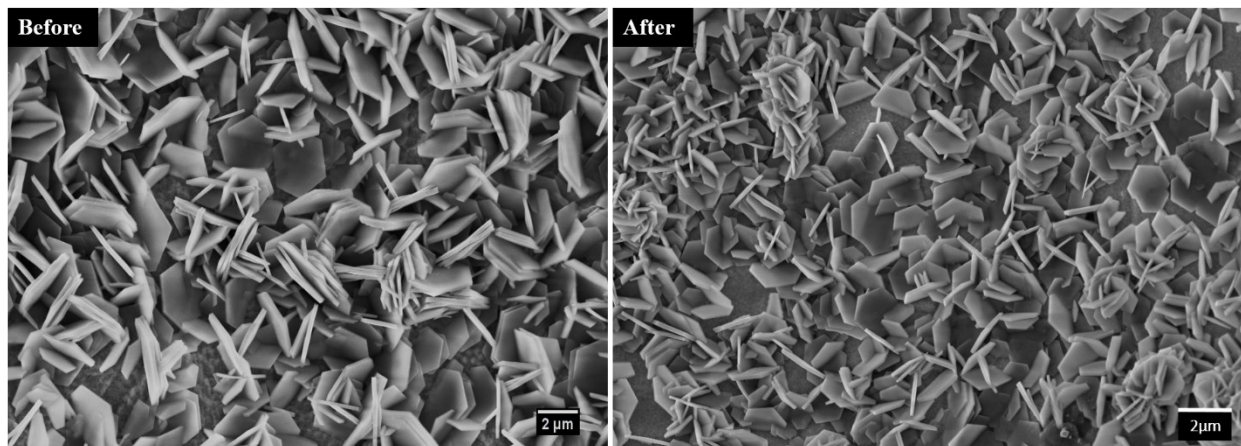

**Figure S6.** SEM of CoFe<sub>2</sub>O<sub>4</sub>/ Ni foam catalyst prepared at pH 9 before and after CP stability test for 44 h of continuous electrolysis.



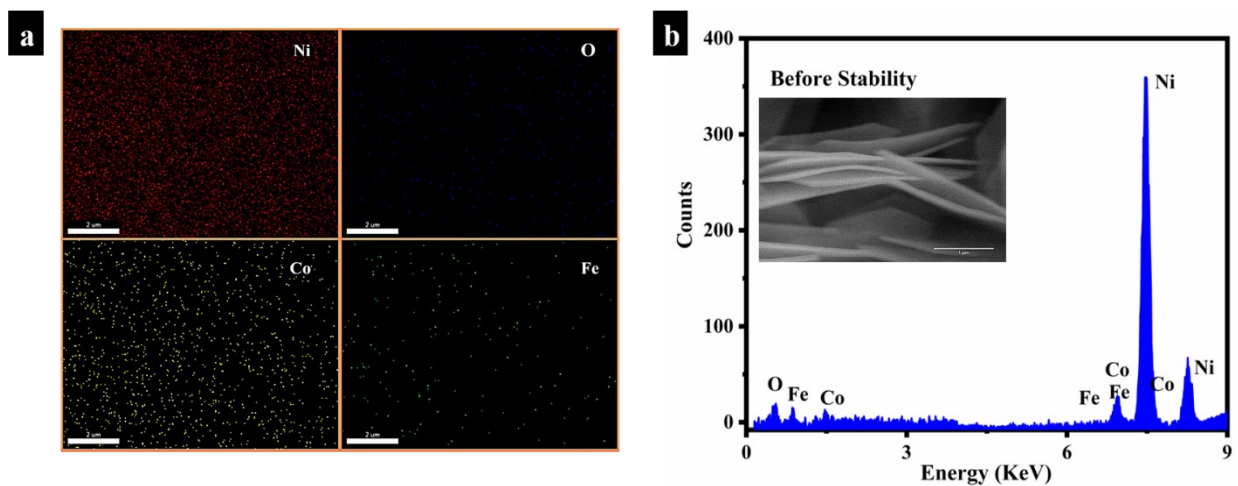

**Figure S7.** EDS of  $\text{CoFe}_2\text{O}_4/\text{Ni}$  foam catalyst prepared at pH 9 before CP stability test for continuous electrolysis.

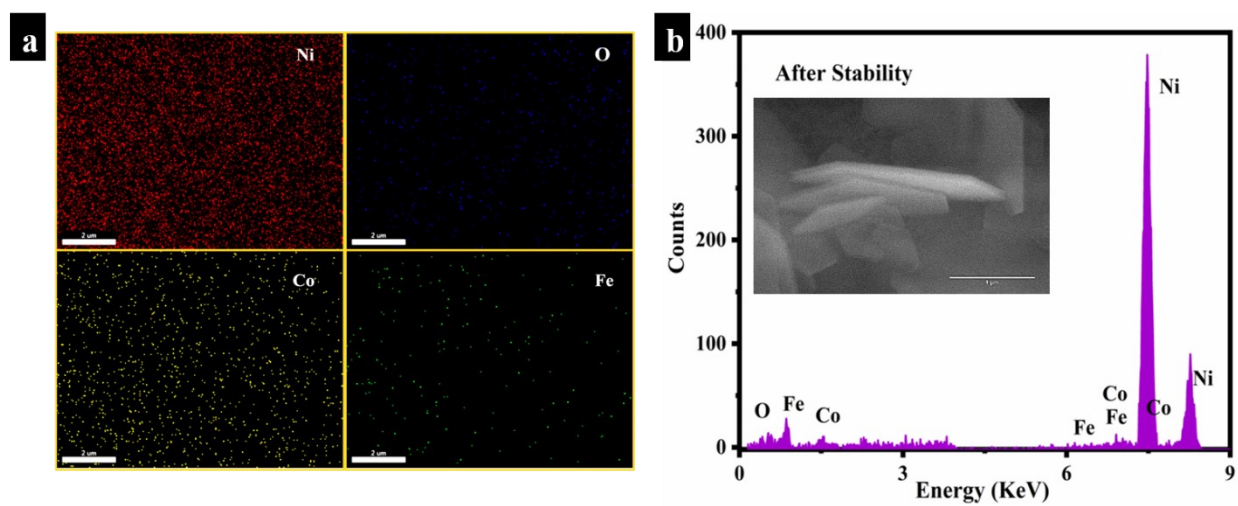

**Figure S8.** EDS of  $\text{CoFe}_2\text{O}_4/\text{Ni}$  foam catalyst prepared at pH 9 after CP stability test for continuous electrolysis.

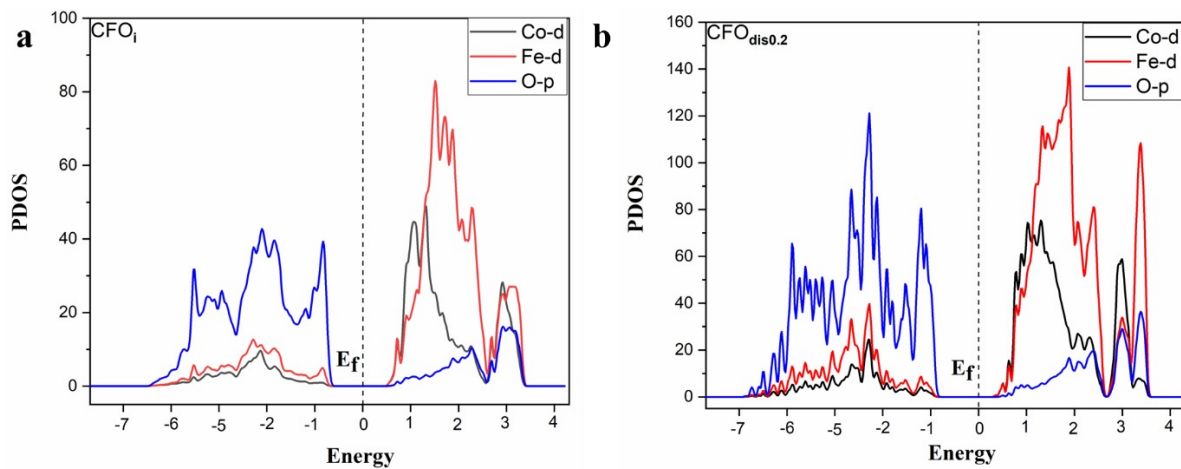

**Figure S9.** PDOS for a)  $\text{CFO}_i$  and b)  $\text{CFO}_{\text{dis}0.2}$

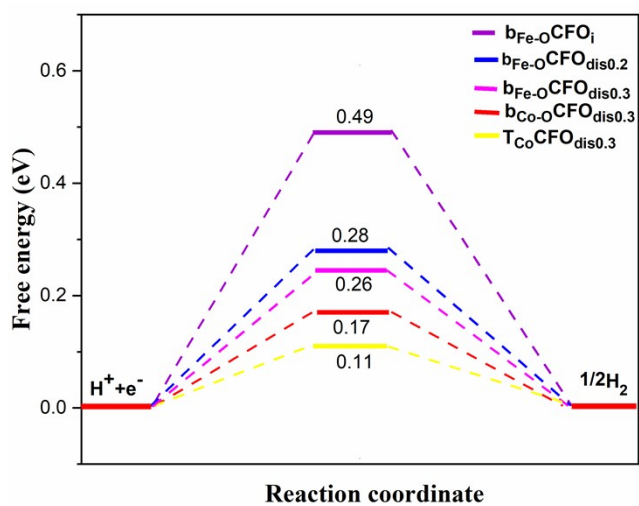

**Figure S10.** HER free energy diagram for catalysts without Ni foam.



**Table S1.** The electrocatalytic activity of our catalyst compared to those recently reported in the literature.

| Catalyst                                                                                          | Overpotential (mV) @ -10mA/cm <sup>2</sup> | Tafel slope (mV dec <sup>-1</sup> ) | Ref.      |
|---------------------------------------------------------------------------------------------------|--------------------------------------------|-------------------------------------|-----------|
| CoFe <sub>2</sub> O <sub>4</sub> /Ni Foam ( $\delta=0.33$ )                                       | 66                                         | 67                                  | This Work |
| CoNi/CoFe <sub>2</sub> O <sub>4</sub> /Ni foam                                                    | 82                                         | 96                                  | 1         |
| Co <sub>3</sub> O <sub>4</sub> -800/GC                                                            | 93                                         | 122.1                               | 2         |
| NiFe-oFe <sub>2</sub> O <sub>4</sub> @Co <sub>3</sub> S <sub>4</sub> /CFP                         | 98                                         | 78.2                                | 3         |
| Ti <sub>3</sub> C <sub>2</sub> -CoFe <sub>2</sub> O <sub>4</sub> /g-C <sub>3</sub> N <sub>4</sub> | 223                                        | 48.5                                | 4         |
| CoNiFe <sub>2</sub> O <sub>4</sub> + Se <sub>x</sub>                                              | 173.5                                      | 91                                  | 5         |
| CoFe <sub>2</sub> O <sub>4</sub> - graphene                                                       | 248.3                                      | 116.6                               | 6         |
| NiFe <sub>2</sub> O <sub>4</sub> - graphene                                                       | 259                                        | 121.4                               | 6         |
| FeSe <sub>2</sub> /CoFe <sub>2</sub> O <sub>4</sub>                                               | 231                                        | 88.76                               | 7         |
| CoFe <sub>2</sub> O <sub>4</sub> ED@NF                                                            | 270                                        | 94                                  | 8         |
| CoFe <sub>2</sub> O <sub>4</sub> / SWNTs                                                          | 263                                        | 46                                  | 9         |
| Ag@CoFe <sub>2</sub> O <sub>4</sub> /g-C <sub>3</sub> N <sub>4</sub>                              | 259                                        | 76.1                                | 10        |

**Table S2.** The current densities normalized to ESCA at different potential values for pH 9, 12.5, 13, respectively.

| Voltage Vs RHE | pH 9<br>(Current density in mA cm <sup>-2</sup> ESCA) | pH 12.5<br>(Current density in mA cm <sup>-2</sup> ESCA) | pH 13<br>(Current density in mA cm <sup>-2</sup> ESCA) |
|----------------|-------------------------------------------------------|----------------------------------------------------------|--------------------------------------------------------|
| -0.08          | 0.055                                                 | 0.05                                                     | 0.0013                                                 |
| -0.09          | 0.6                                                   | 0.054                                                    | 0.0015                                                 |
| -0.1           | 0.068                                                 | 0.061                                                    | 0.0016                                                 |
| -0.11          | 0.077                                                 | 0.067                                                    | 0.0017                                                 |
| -0.12          | 0.087                                                 | 0.078                                                    | 0.0021                                                 |

## References

1. Suharyana, R. R. Febriani, N. P. Prasetya, Utari, N. A. Wibowo, Suharno, A. Supriyanto, A. H. Ramelan and B. Purnama, *Kuwait J. Sci.*, 2023, **50**, 575–579.
2. C. Xiao, Y. Li, X. Lu and C. Zhao, *Adv. Funct. Mater.*, 2016, **26**, 3515–3523.
3. S. Li, S. Sirisomboonchai, A. Yoshida, X. An, X. Hao, A. Abudula and G. Guan, *J. Mater.*

- Chem. A*, 2018, **6**, 19221–19230.
4. X. Hu, X. Tian, Y.-W. Lin and Z. Wang, *RSC Adv.*, 2019, **9**, 31563–31571.
  5. S. Riyajuddin, K. Azmi, M. Pahuja, S. Kumar, T. Maruyama, C. Bera and K. Ghosh, *ACS Nano*, 2021, **15**, 3, 5586–5599.
  6. F. Bao, E. Kemppainen, I. Dorbandt, R. Bors, F. Xi, R. Schlatmann, R. van de Krol and S. Calnan, *ChemElectroChem*, 2021, **8**, 195–208.
  7. L. Huang, Y. Hou, Z. Yu, Z. Peng, L. Wang, J. Huang, B. Zhang, L. Qian, L. Wu and Z. Li, *Int. J. Hydrogen Energy*, 2017, **42**, 9458–9466.
  8. S. I. Perez Bakovic, P. Acharya, M. Watkins, H. Thornton, S. Hou and L. F. Greenlee, *J. Catal.*, 2021, **394**, 104–112.
  9. S. Anantharaj and S. Noda, *ChemElectroChem*, 2020, **7**, 2297–2308.
  10. Y. Zhu, H. A. Tahini, Z. Hu, J. Dai, Y. Chen, H. Sun, W. Zhou, M. Liu, S. C. Smith, H. Wang and Z. Shao, *Nat. Commun.*, 2019, **10**, 149
